# Supplementary material for: Metabolic Footprinting of Microbial Systems Based on Comprehensive In Silico Predictions of MS/MS Relevant Data
Source: MDPI journal article supplement (doi:10.3390/metabo12030257), 2022-03-17
Supplement: s1 [file s1]

ESM1

Additional plots

Metabolites

**Metabolic footprinting of microbial systems based on comprehensive in-silico predictions of MS/MS relevant data**

Alexander Reiter<sup>1,2</sup>, Jian Asgari<sup>1,2</sup>, Wolfgang Wiechert<sup>1,3</sup>, Marco Oldiges<sup>1,2</sup>

<sup>1</sup> Forschungszentrum Jülich GmbH, Institute of Bio- and Geosciences, IBG-1: Biotechnology, Jülich 52425, Germany

<sup>2</sup> RWTH Aachen University, Institute of Biotechnology, Aachen 52062, Germany

<sup>3</sup> RWTH Aachen University, Computational Systems Biotechnology, Aachen 52062, Germany

Corresponding author: Prof. Dr. Marco Oldiges, mail: [m.oldiges@fz-juelich.de](mailto:m.oldiges@fz-juelich.de), phone: +49 2461 61-3951, fax: +49 2461 61-3870

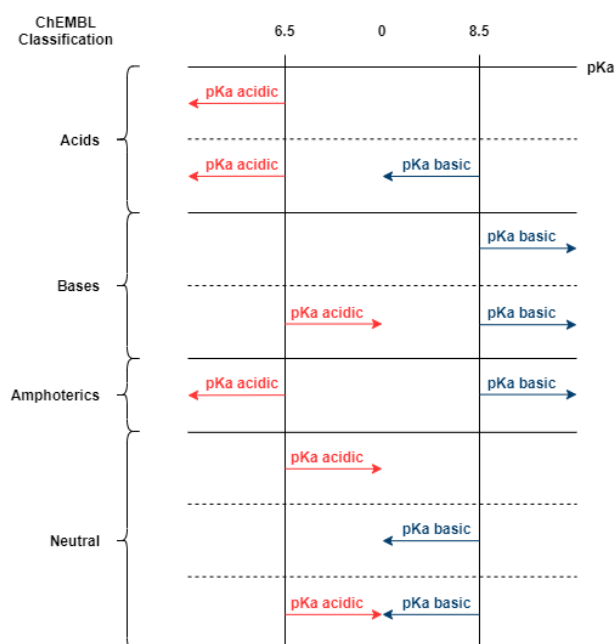

**Chart 1:** Visual representation of ChEMBL pK<sub>a</sub> classification; Classification of acids, bases, amphoterics (zwitterions) and neutral molecules based on their acidic and basic pK<sub>a</sub> values.

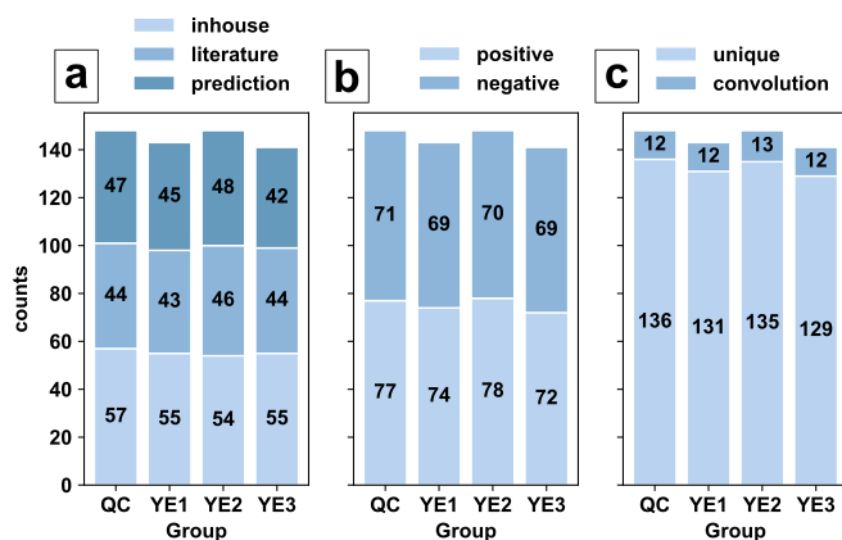

**Chart 2:** Metabolite identification and classification of yeast extract case study for quality control samples (QC) and three yeast extracts (YE1, YE2, YE3); Classification based on (a) Source of mass transition, (b) ionization mode, (c) Unique and convoluted mass transitions.

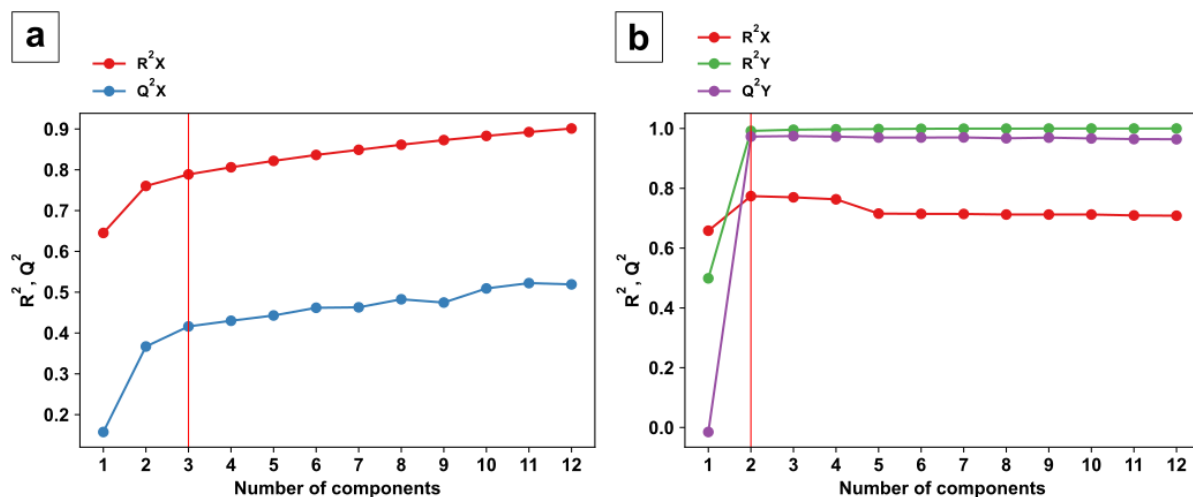

**Chart 3:** Scree plots for hyperparameter optimization of PCA (a) and PLS-DA (b); Model performance indicator were determined by stratified double 5-fold cross-validation.  $R^2X$  describes the goodness of fit or explained variance of the predictor matrix by the model.  $Q^2X$  describes the goodness of prediction.  $R^2Y$  describes the goodness of fit or explained variance of the response by the model.  $Q^2Y$  describes the goodness of prediction for the response. The hyperparameter optimization was stopped, if the increase in  $Q^2X$  (a) or  $Q^2Y$  (b) was less than 5%

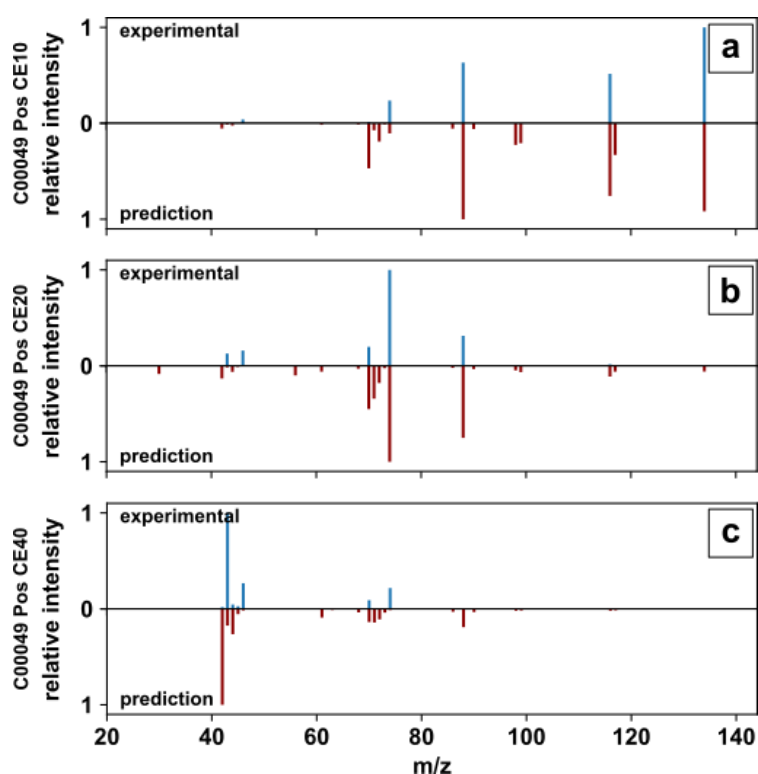

**Chart 4:** Mass-to-charge spectra comparison for C00049 in positive mode; Experimental data acquired by direct infusion of metabolite standard with ESI-QqToF in product ion scan mode for 10 (a), 20 (b) and 40 V (c). Predicted product ion spectra acquired by CFM-ID based on SMILES compound identifier

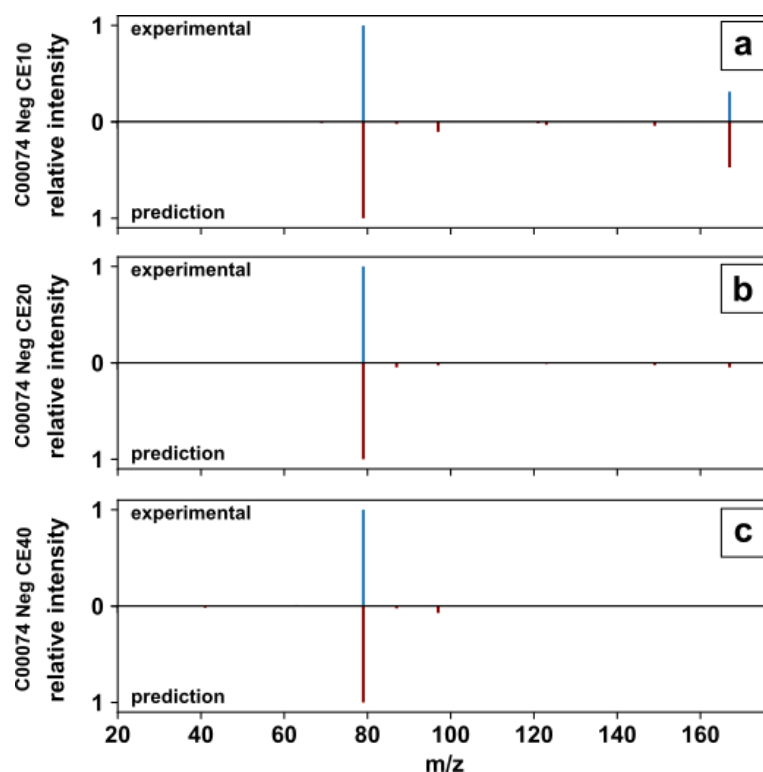

**Chart 5:** Mass-to-charge spectra comparison for C00074 in negative mode; Experimental data acquired by direct infusion of metabolite standard with ESI-QqToF in product ion scan mode for 10 (a), 20 (b) and 40 V (c). Predicted product ion spectra acquired by CFM-ID based on SMILES compound identifier

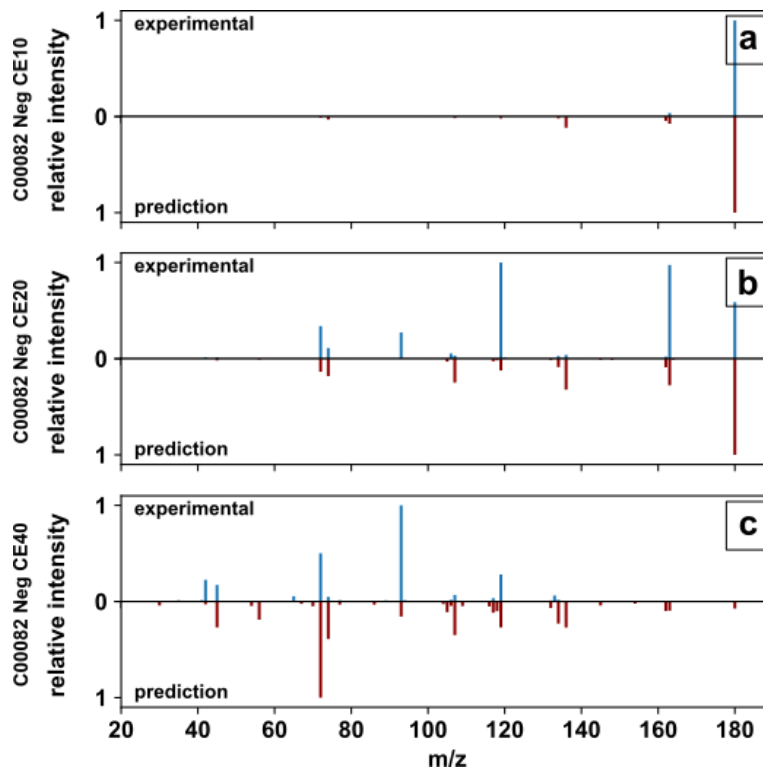

**Chart 6:** Mass-to-charge spectra comparison for C00082 in negative mode; Experimental data acquired by direct infusion of metabolite standard with ESI-QqToF in product ion scan mode for 10 (a), 20 (b) and 40 V (c). Predicted product ion spectra acquired by CFM-ID based on SMILES compound identifier

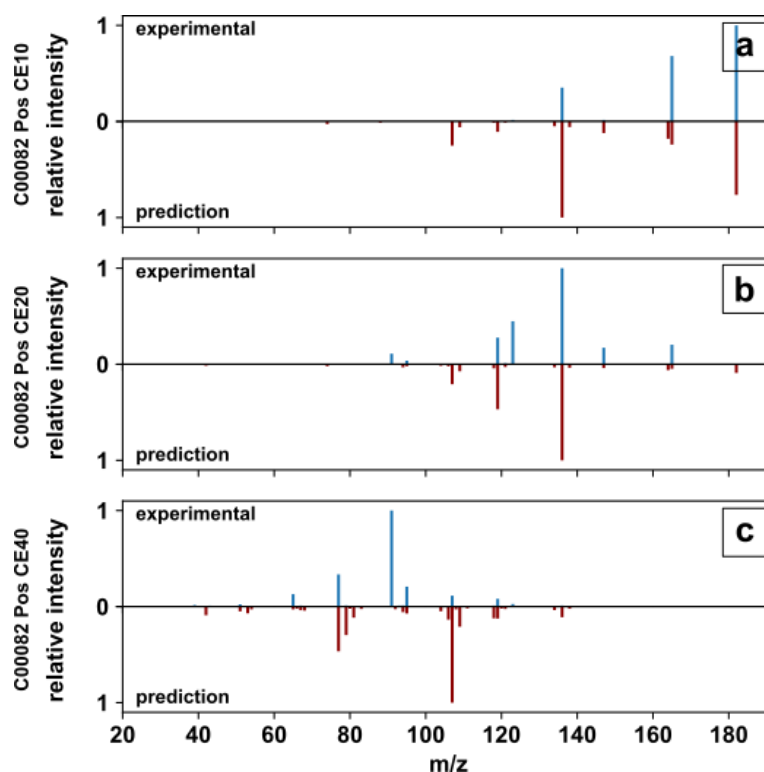

**Chart 7:** Mass-to-charge spectra comparison for C00082 in positive mode; Experimental data acquired by direct infusion of metabolite standard with ESI-QqToF in product ion scan mode for 10 (a), 20 (b) and 40 V (c). Predicted product ion spectra acquired by CFM-ID based on SMILES compound identifier

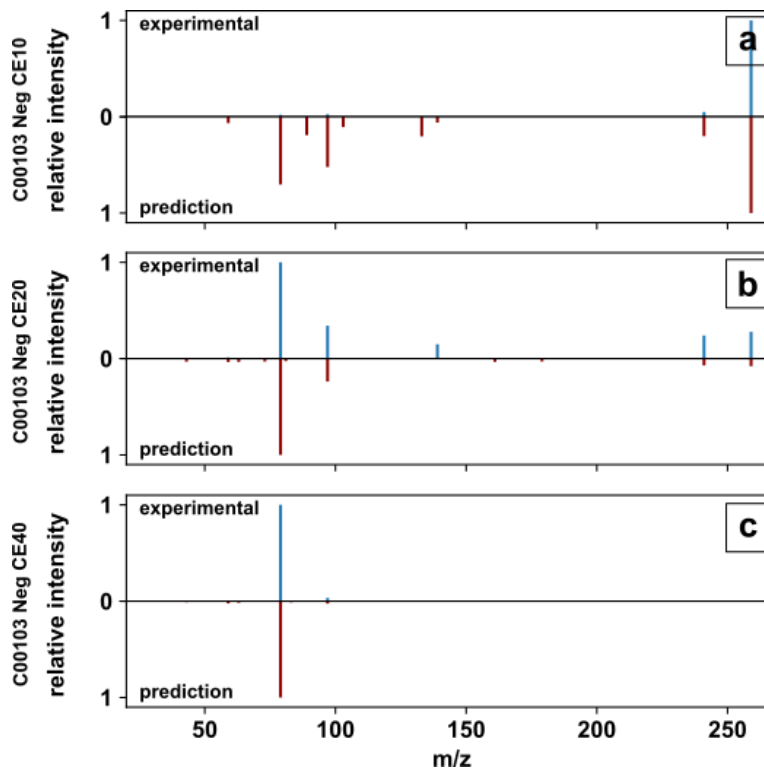

**Chart 8:** Mass-to-charge spectra comparison for C00103 in negative mode; Experimental data acquired by direct infusion of metabolite standard with ESI-QqToF in product ion scan mode for 10 (a), 20 (b) and 40 V (c). Predicted product ion spectra acquired by CFM-ID based on SMILES compound identifier
