# Supplementary material for: Metabolic Footprinting of Microbial Systems Based on Comprehensive In Silico Predictions of MS/MS Relevant Data
Source: Metabolites. 2022 Mar 17;12(3):257. doi: 10.3390/metabo12030257 (PMC8949988; doi:10.3390/metabo12030257)
Supplement: Supplementary file 1 [file metabolites-12-00257-s001.zip › ESM_2.xlsx]

## Sheet: Information
ESM2	Additional tables
Metabolites
Metabolic footprinting of microbial systems based on comprehensive in-silico predictions of MS/MS relevant data
Alexander Reiter1,2, Jian Asgari1,2 , Wolfgang Wiechert1,3, Marco Oldiges1,2
1 Forschungszentrum Jülich GmbH, Institute of Bio- and Geosciences, IBG-1: Biotechnology, Jülich 52425, Germany
2 RWTH Aachen University, Institute of Biotechnology, Aachen 52062, Germany
3 RWTH Aachen University, Computational Systems Biotechnology, Aachen 52062, Germany
Corresponding author: Prof. Dr. Marco Oldiges, mail: m.oldiges@fz-juelich.de, phone: +49 2461 61-3951, fax: +49 2461 61-3870

## Sheet: Sheet 1 - Metabolome standard
Standard	Class	Component Name	Kegg ID	In CoA (qualitative list)	In CoA (quantitative list)	In Pichia pastoris (KEGG, PPU)	In method	Mass transition source	Unique or convoluted Signal	Identified in measurement
Pichia pastoris	Amino acids	Alanine	C00041	True	True	True	True	Inhouse	Unique	True
Pichia pastoris	Amino acids	Arginine	C00062	True	True	True	True	Inhouse	Unique	True
Pichia pastoris	Amino acids	Asparagine	C00152	True	True	True	True	Inhouse	Unique	True
Pichia pastoris	Amino acids	Glutamate	C00025	True	True	True	True	Inhouse	Unique	True
Pichia pastoris	Amino acids	Glutamine	C00064	True	True	True	True	Inhouse	Unique	True
Pichia pastoris	Amino acids	Histidine	C00135	True	True	True	True	Inhouse	Unique	True
Pichia pastoris	Amino acids	Homoserine	C00263	True	True	True	True	Inhouse	Unique	True
Pichia pastoris	Amino acids	Kynurenine	C00328	True	True	True	True	Prediction	Unique	True
Pichia pastoris	Amino acids	Leucine	C00123	True	True	True	True	Inhouse	Unique	True
Pichia pastoris	Amino acids	Methionine	C00073	True	True	True	True	Inhouse	Unique	True
Pichia pastoris	Amino acids	Proline	C00148	True	True	True	True	Inhouse	Unique	True
Pichia pastoris	Amino acids	Serine	C00065	True	True	True	True	Inhouse	Unique	True
Pichia pastoris	Amino acids	Threonine	C00188	True	True	True	True	Inhouse	Unique	True
Pichia pastoris	Amino acids	Tryptophan	C00078	True	True	True	True	Inhouse	Unique	True
Pichia pastoris	Amino acids	Tyrosine	C00082	True	True	True	True	Inhouse	Unique	True
Pichia pastoris	Amino acids	α-Aminoadipic acid	C00956	True	True	True	True	Inhouse	Unique	True
Pichia pastoris	Amino acids	Lysine	C00047	True	True	True	True	Inhouse	Convolution	True
Pichia pastoris	Amino acids	Phenylalanine	C00079	True	True	True	True	Inhouse	Convolution	True
Pichia pastoris	Amino acids	Valine	C00183	True	True	True	True	Inhouse	Convolution	True
Pichia pastoris	Nucleic acids	Adenine	C00147	True	True	True	True	Inhouse	Unique	True
Pichia pastoris	Nucleic acids	Adenosine monophosphate	C00020	True	True	True	True	Inhouse	Unique	True
Pichia pastoris	Nucleic acids	Guanosine diphosphate	C00035	True	True	True	True	Inhouse	Unique	True
Pichia pastoris	Nucleic acids	Guanosine monophosphate	C00144	True	True	True	True	Inhouse	Unique	True
Pichia pastoris	Nucleic acids	Uridine monophosphate	C00105	True	True	True	True	Literature	Unique	True
Pichia pastoris	Organic acids	Citrate	C00158	True	True	True	True	Inhouse	Unique	False
Pichia pastoris	Organic acids	Isocitrate	C00311	True	True	True	True	Inhouse	Unique	True
Pichia pastoris	Organic acids	Succinate	C00042	True	True	True	True	Inhouse	Unique	True
Pichia pastoris	Organic acids	Fumerate	C00122	True	True	True	True	Inhouse	Convolution	True
Pichia pastoris	Other	Glutathione, oxidized	C00127	True	True	True	True	Literature	Unique	True
Pichia pastoris	Other	Glutathione, reduced	C00051	True	True	True	True	Literature	Unique	True
Pichia pastoris	Vitamins and cofactors	Nicotinamide adenine dinucleotide, reduced	C00004	True	True	True	True	Inhouse	Unique	True
Pichia pastoris	Amino acids	Cystathionine	C02291	True	True	True	False			False
Pichia pastoris	Amino acids	Dihydroxyisovalerate	C04039	True	True	True	False			False
Pichia pastoris	Nucleic acids	Cyclic guanosine monophosphate	C00942	True	True	True	False			False
Pichia pastoris	Nucleic acids	Uridine	C00299	True	True	True	True	Inhouse	Unique	False
Pichia pastoris	Organic acids	Gluconate	C00257	True	True	True	True	Inhouse	Unique	False
Pichia pastoris	Organic acids	Malate	C00497	True	True	True	True	Inhouse	Unique	False
Pichia pastoris	Vitamins and cofactors	Nicotinamide adenine dinucleotide phosphate, oxidized	C00006	True	True	True	True	Inhouse	Unique	False
Pichia pastoris	Vitamins and cofactors	Nicotinamide adenine dinucleotide, oxidized	C00003	True	True	True	True	Inhouse	Unique	False
Pichia pastoris	Amino acids	Aspartate	C00049	True	False	True	True	Inhouse	Unique	True
Pichia pastoris	Amino acids	Citrulline	C00327	True	False	True	True	Inhouse	Unique	True
Pichia pastoris	Amino acids	Glycine	C00037	True	False	True	True	Inhouse	Unique	True
Pichia pastoris	Amino acids	Isoleucine	C00407	True	False	True	True	Inhouse	Unique	True
Pichia pastoris	Amino acids	Ornithine	C00077	True	False	True	True	Inhouse	Unique	True
Pichia pastoris	Amino acids	S-Adenosyl-homocysteine	C00021	True	False	True	True	Literature	Unique	True
Pichia pastoris	Amino acids	α-Ketoisovalerate	C00141	True	False	True	True	Inhouse	Convolution	True
Pichia pastoris	Nucleic acids	5'-Deoxy-5'-Methylthioadenosine	C00170	True	False	True	True	Literature	Unique	True
Pichia pastoris	Nucleic acids	Adenosine	C00212	True	False	True	True	Literature	Unique	True
Pichia pastoris	Nucleic acids	Adenosine triphosphate	C00002	True	False	True	True	Inhouse	Unique	True
Pichia pastoris	Nucleic acids	Cyclic adenosine monophosphate	C00575	True	False	True	True	Inhouse	Unique	True
Pichia pastoris	Nucleic acids	Cytidine monophosphate	C00055	True	False	True	True	Literature	Unique	True
Pichia pastoris	Nucleic acids	Guanine	C00242	True	False	True	True	Literature	Unique	True
Pichia pastoris	Nucleic acids	Guanosine triphosphate	C00044	True	False	True	True	Inhouse	Unique	True
Pichia pastoris	Nucleic acids	Inosine	C00294	True	False	True	True	Literature	Unique	True
Pichia pastoris	Nucleic acids	Inosine monophosphate	C00130	True	False	True	True	Inhouse	Unique	True
Pichia pastoris	Nucleic acids	Uridine diphosphate	C00015	True	False	True	True	Literature	Unique	True
Pichia pastoris	Nucleic acids	Adenosine diphosphate	C00008	True	False	True	True	Inhouse	Convolution	True
Pichia pastoris	Organic acids	Lactate	C00186	True	False	True	True	Literature	Unique	True
Pichia pastoris	Organic acids	Pyruvate	C00022	True	False	True	True	Inhouse	Unique	True
Pichia pastoris	Organic acids	α-Ketoglutarate	C00026	True	False	True	True	Inhouse	Unique	True
Pichia pastoris	Sugars, Sugar phosphates	6-Phosphogluconate	C00345	True	False	True	True	Inhouse	Unique	True
Pichia pastoris	Sugars, Sugar phosphates	Dihydroxyacetone phosphate	C00111	True	False	True	True	Inhouse	Unique	True
Pichia pastoris	Sugars, Sugar phosphates	Fructose-1,6-bisphosphate	C00354	True	False	True	True	Inhouse	Unique	True
Pichia pastoris	Sugars, Sugar phosphates	Mannitol	C00392	True	False	True	True	Literature	Unique	True
Pichia pastoris	Sugars, Sugar phosphates	Ribose-5-phosphate	C00117	True	False	True	True	Inhouse	Unique	True
Pichia pastoris	Sugars, Sugar phosphates	Fructose	C00095	True	False	True	True	Prediction	Convolution	True
Pichia pastoris	Sugars, Sugar phosphates	Fructose-6-phosphate	C00085	True	False	True	True	Inhouse	Convolution	True
Pichia pastoris	Sugars, Sugar phosphates	Glucose-6-phosphate	C00092	True	False	True	True	Inhouse	Convolution	True
Pichia pastoris	Sugars, Sugar phosphates	Mannose	C00159	True	False	True	True	Prediction	Convolution	False
Pichia pastoris	Sugars, Sugar phosphates	Mannose-6-phosphate	C00275	True	False	True	True	Inhouse	Convolution	True
Pichia pastoris	Sugars, Sugar phosphates	Ribose	C00121	True	False	True	True	Prediction	Convolution	True
Pichia pastoris	Sugars, Sugar phosphates	Trehalose	C01083	True	False	True	True	Inhouse	Convolution	False
Pichia pastoris	Vitamins and cofactors	Biotin	C00120	True	False	True	True	Literature	Unique	True
Pichia pastoris	Vitamins and cofactors	Choline	C00114	True	False	True	True	Literature	Unique	True
Pichia pastoris	Vitamins and cofactors	Nicotinamide	C00153	True	False	True	True	Literature	Unique	True
Pichia pastoris	Amino acids	Betaine	C00719	True	False	False	False			False
Pichia pastoris	Amino acids	Guanidineacetic acid	C00581	True	False	False	False			False
Pichia pastoris	Amino acids	Sarcosine	C00213	True	False	False	False			False
Pichia pastoris	Amino acids	(+/-)-3-Methyl-2-oxovaleric acid	C00671	True	False	True	False			False
Pichia pastoris	Amino acids	Argininosuccinic acid	C03406	True	False	True	False			False
Pichia pastoris	Nucleic acids	Deoxyadenosine monophosphate	C00360	True	False	True	False			False
Pichia pastoris	Nucleic acids	Guanosine	C00387	True	False	True	False			False
Pichia pastoris	Nucleic acids	Pseudouridine	C02067	True	False	True	False			False
Pichia pastoris	Nucleic acids	Cytidine triphosphate	C00063	True	False	True	True	Inhouse	Unique	False
Pichia pastoris	Nucleic acids	Uridine triphosphate	C00075	True	False	True	True	Inhouse	Unique	False
Pichia pastoris	Organic acids	cis-Aconitate	C00417	True	False	True	True	Inhouse	Unique	False
Pichia pastoris	Organic acids	DL-2-Hydroxyglutarate	C01087	True	False	True	True	Prediction	Unique	False
Pichia pastoris	Other	Glutamylcysteine	C00669	True	False	True	True	Prediction	Unique	True
Pichia pastoris	Other	Mevalonic acid	C00418	True	False	True	True	Prediction	Unique	True
Pichia pastoris	Sugars, Sugar phosphates	Erythritol	C00503	True	False	False	False			False
Pichia pastoris	Sugars, Sugar phosphates	Galactose	C00124	True	False	False	False			False
Pichia pastoris	Sugars, Sugar phosphates	2-Phosphoglycerate	C00631	True	False	True	False			False
Pichia pastoris	Sugars, Sugar phosphates	Sedoheptulose-7-phosphate	C05382	True	False	True	False			False
Pichia pastoris	Sugars, Sugar phosphates	Glucose	C00031	True	False	True	True	Inhouse	Convolution	False
